# Supplementary material for: Experimental immunization of mice with a recombinant bovine enterovirus vaccine expressing BVDV E0 protein elicits a long-lasting serologic response
Source: Virol J. 2020 Jul 1;17:88. doi: 10.1186/s12985-020-01338-6 (PMC7331136; doi:10.1186/s12985-020-01338-6)
Supplement: Supplementary file 3 — Additional file 3: Table S1. The raw data of the anti-BEV VP1 antibodies detection in experimental mice Table S2. The raw data of the anti-BVDV E0 antibodies detection in experimental mice [file 12985_2020_1338_MOESM3_ESM.xlsx]

## Sheet: Table 1
Table 1. The raw data of the anti-BEV VP1 antibodies detection in experimental mice
Day post immunization	rBEV-E0						BEV						BVDV						PBS
0	0.18212	0.135798	0.150772	0.113212	0.0913737	0.144724	0.149212	0.118822	0.122388	0.152285	0.188338	0.0890456	0.0188662	0.157281	0.191531	0.135241	0.0638353	0.115526	0.0148662	0.107281	0.0515309	0.145241	0.0438353	0.0855256
7	1.66132	1.16198	1.06953	1.0865	1.18107	1.20814	1.38862	1.5538	1.14864	1.47383	1.27893	1.1844	0.169057	0.0880775	0.165405	0.0842451	0.119348	0.128293	0.069057	0.0880775	0.0654045	0.0842451	0.069348	0.0829319
14	1.67982	1.65236	1.4287	1.49089	1.71107	1.55659	1.79224	1.82334	1.773	1.82437	1.7282	1.61039	0.109469	0.144872	0.184379	0.126635	0.153498	0.0992975	0.0946865	0.104872	0.084379	0.126635	0.0934978	0.0992975
21	1.4982	1.38294	1.80183	1.27287	1.50144	1.45052	1.52941	1.59684	1.28115	1.41729	1.65937	1.44951	0.158244	0.0927436	0.121029	0.0847256	0.14988	0.137228	0.0782443	0.0527436	0.121029	0.0847256	0.0898801	0.0872282
28	1.47541	1.49753	1.54797	1.43095	1.56617	1.31876	1.49363	1.62113	1.5363	1.40128	1.65505	1.56403	0.131176	0.0851689	0.108927	0.189338	0.119531	0.120596	0.0911762	0.0851689	0.0892742	0.0893383	0.0895306	0.0905964

## Sheet: Table 2
Table 2. The raw data of the anti-BVDV E0 antibodies detection in experimental mice
Day post immunization	BEV						rBEV-E0						BVDV						PBS
0	0.135713	0.161325	0.126843	0.139478	0.154915	0.139283	0.109123	0.101928	0.108367	0.1048	0.123953	0.103461	0.121605	0.141928	0.0983673	0.1448	0.123953	0.103461	0.088468	0.108437	0.0960315	0.112206	0.0930023	0.128639
7	0.120275	0.138151	0.165138	0.0910594	0.122499	0.115059	0.275861	0.300919	0.321751	0.29479	0.283571	0.257191	0.302509	0.260919	0.321751	0.29479	0.343572	0.317191	0.108731	0.0952309	0.122595	0.0854328	0.0971723	0.137291
14	0.156574	0.189346	0.136438	0.160571	0.161847	0.112847	0.592217	0.533811	0.611632	0.576135	0.507665	0.573131	0.739312	0.693811	0.711632	0.706135	0.767665	0.663131	0.0973392	0.103656	0.0839286	0.0875171	0.118056	0.132107
21	0.148329	0.114644	0.149175	0.139496	0.157744	0.173329	0.529422	0.500404	0.582356	0.516054	0.529677	0.542043	0.684651	0.600404	0.664236	0.696054	0.629671	0.642043	0.0908947	0.104681	0.0865154	0.136754	0.093918	0.101567
28	0.144959	0.155198	0.0990694	0.149571	0.117679	0.139918	0.599361	0.517713	0.543169	0.565083	0.506405	0.534528	0.646558	0.677713	0.623169	0.585083	0.626405	0.664528	0.137134	0.0839286	0.128752	0.108981	0.0911276	0.121321
